# Supplementary material for: Precise synthesis and photophysical properties of a small chiral carbon nanotube segment: cyclo[7]paraphenylene-2,6-naphthylene
Source: Royal Society of Chemistry journal article supplement (doi:10.1039/c9cc04700j), 2019-01-01
Supplement: c9cc04700j1.pdf [file c9cc04700j1.pdf]

*Supporting Information*

**Precise synthesis and photophysical properties of a small chiral  
carbon nanotube segment: Cyclo[7]paraphenylene-2,6-naphthylene**

Jinyi Wang,<sup>†a</sup> Guilin Zhuang,<sup>†b</sup> Qiang Huang,<sup>a</sup> Yifei Xiao,<sup>a</sup> Yu Zhou,<sup>a</sup> Huiqing Liu,<sup>a</sup>  
Pingwu Du<sup>\*a</sup>

<sup>a</sup>Hefei National Laboratory for Physical Sciences at the Microscale, *iChEM*  
(Collaborative Innovation Center of Chemistry for Energy Materials), CAS Key  
Laboratory of Materials for Energy Conversion, Department of Materials Science and  
Engineering, University of Science and Technology of China, 96 Jinzhai Road, Hefei,  
Anhui Province, 230026, China

<sup>b</sup>College of Chemical Engineering, Zhejiang University of Technology, 18 Chaowang  
Road, Hangzhou, Zhejiang Province, 310032, China

<sup>†</sup> These authors contributed equally to this work

\*Corresponding author: [dupingwu@ustc.edu.cn](mailto:dupingwu@ustc.edu.cn)

Tel/Fax: 86-551-63606207

## 1. General and Materials Information

All anhydrous solvents for synthesis were used under argon or nitrogen atmosphere, and other chemicals were purchased from commercial suppliers (Acros or Innochem). All the air-sensitive reactions were carried out using the standard Schlenk technique under argon or nitrogen atmosphere. NMR spectra were recorded on a Bruker BioSpin ( $^1\text{H}$  400 MHz,  $^{13}\text{C}$  100 MHz). Chemical shifts for  $^1\text{H}$  NMR are expressed in parts per million (ppm) relative to tetramethylsilane ( $\delta$  0.00 ppm) or  $\text{CHCl}_3$  ( $\delta$  7.26 ppm). Chemical shifts for  $^{13}\text{C}$  NMR are expressed in ppm relative to  $\text{CDCl}_3$  ( $\delta$  77.0 ppm). Data are reported as follows: chemical shift, multiplicity (s = singlet, d = doublet, m = multiplet, br = broad signal), coupling constant (Hz), and integration. High-resolution mass spectrometry (HR-MS) analyses were carried out using MALDI-TOF-MS techniques (matrix: trans-2-[3-(4-tert-Butylphenyl)-2-methyl-2-propenylidene]malononitrile (DCTB)). UV-Vis spectra were obtained on a UNIC-3802 spectrophotometer in standard glass cuvettes. Preparative thin-layer chromatography (PTLC) were performed using silica gel GF254 precoated plates and flash chromatography was performed on silica gel (200~300 mesh).

### **Synthesis of Compound (1) and 2,6-bis(4,4,5,5-tetramethyl-1,3,2-dioxaborolan-2-yl)naphthalene (2).**

Compound **1** was prepared according to the reported method by our group.<sup>[S1]</sup> 2,6-bis(4,4,5,5-tetramethyl-1,3,2-dioxaborolan-2-yl)naphthalene **2** was prepared according to the literature.<sup>[S2]</sup>

### Synthesis of compound **3**.

To a mixture of **2** (70.65 mg, 0.186 mmol), **1** (163.32 mg, 0.186 mmol), and potassium hydrate (134 mg, 2.388 mmol) in a round-bottom flask (500 mL) was added THF (250 mL) and H<sub>2</sub>O (10 mL), then Pd(PPh<sub>3</sub>)<sub>4</sub> (30.06 mg, 0.026 mmol) were added under argon atmosphere. Thereafter, the solution was heated at 85 °C for 48 hours. Upon cooling to room temperature, solvent was removed under vacuum and the residue was extracted with CH<sub>2</sub>Cl<sub>2</sub>. The combined organic layer was dried over anhydrous MgSO<sub>4</sub>, filtered and concentrated under reduced pressure to afford crude product **3** as a gray solid for the next step without further purification.

### Synthesis of [7]CPPNa<sub>2,6</sub> (**4**).

To a round-bottom flask (50 mL, vessel A) containing a magnetic stirring bar were added sodium metal (274 mg, 11.9 mmol), dry THF (12 mL), and naphthalene (1.00 g, 7.82 mmol), and the resultant mixture was stirred at room temperature for 1 day. To another 250-mL round-bottom flask (vessel B) containing the above dry crude product **3** and dry THF (30 mL) was added a solution of sodium naphthalide (2 mL, 2 mmol, 1.0 M in THF) in vessel A at -78 °C. This mixture was kept stirring at -78 °C for 2 hours. Then, 1.5 mL of I<sub>2</sub> solution (1 M in THF) was added. After warmed up to room temperature, the mixture was quenched with aqueous saturated sodium thiosulfate, extracted with CH<sub>2</sub>Cl<sub>2</sub>, dried over anhydrous MgSO<sub>4</sub>, and concentrated under reduced pressure. The crude product was purified by column chromatography with hexane/CH<sub>2</sub>Cl<sub>2</sub> as the eluent (v/v, 3:1). Further purification by recrystallization from MeOH and *n*-hexane afforded pure [7]CPPNa<sub>2,6</sub> (26 mg, 21%) as yellow solid. Mp:

113-115 °C. <sup>1</sup>H NMR (CDCl<sub>3</sub>, 400 MHz): δ 7.75 (s, 2H), 7.64 (s, 4H), 7.54 (d, *J* = 8.2 Hz, 4H), 7.46 (brs, 24H). <sup>13</sup>C NMR (CDCl<sub>3</sub>, 100 MHz): δ 125.51, 125.85, 127.41, 127.43, 127.47, 127.52, 127.58, 127.63, 128.32, 133.30, 136.30, 137.84, 137.86, 137.94, 137.95, 138.01, 138.06. IR (KBr) 722 (w), 732 (w), 752 (m), 802 (w), 811 (w), 821 (m), 945 (w), 999 (w), 1074 (w), 1120 (w), 1212 (w), 1261 (w), 1381 (w), 1462 (m), 1482 (w), 1586 (w), 1631 (w), 1726 (w), 2854 (m), 2871 (w), 2925 (s), 2954 (w) cm<sup>-1</sup>. HR-MS (MALDI-TOF) *m/z* calcd. for C<sub>52</sub>H<sub>34</sub> [M]<sup>+</sup>: 658.2661, found 658.2612.

## 2. Physical characterizations

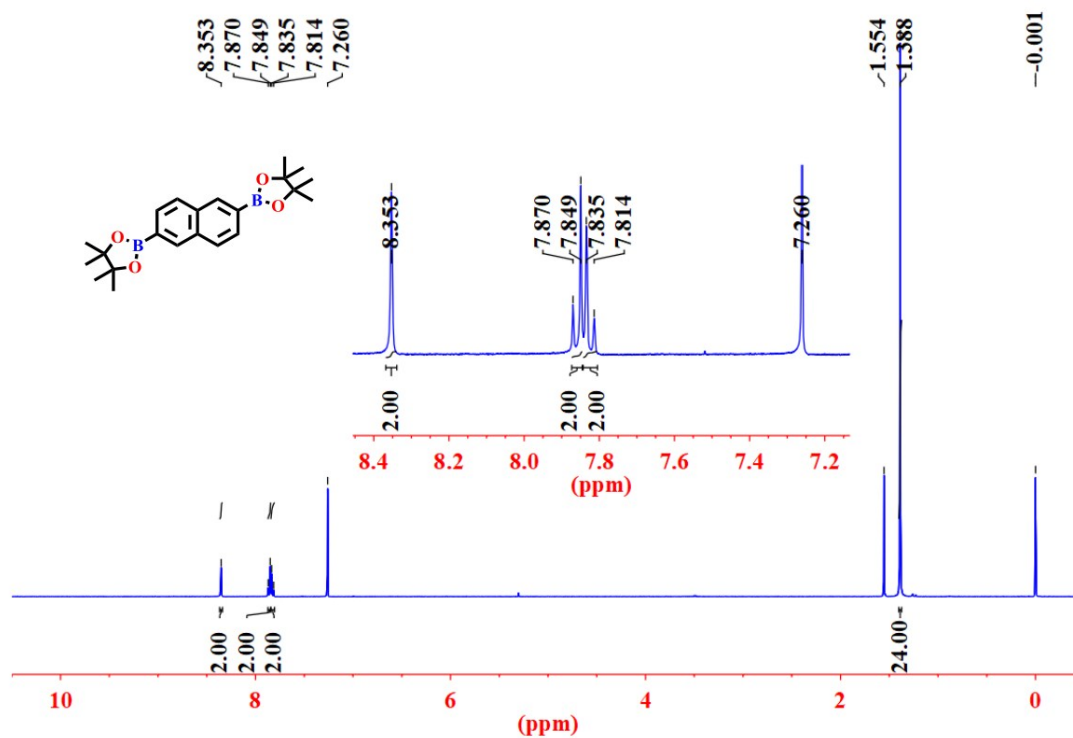

**Figure S1.** <sup>1</sup>H NMR spectrum of 2,6-bis(4,4,5,5-tetramethyl-1,3,2-dioxaborolan-2-yl)naphthalene in CDCl<sub>3</sub>.

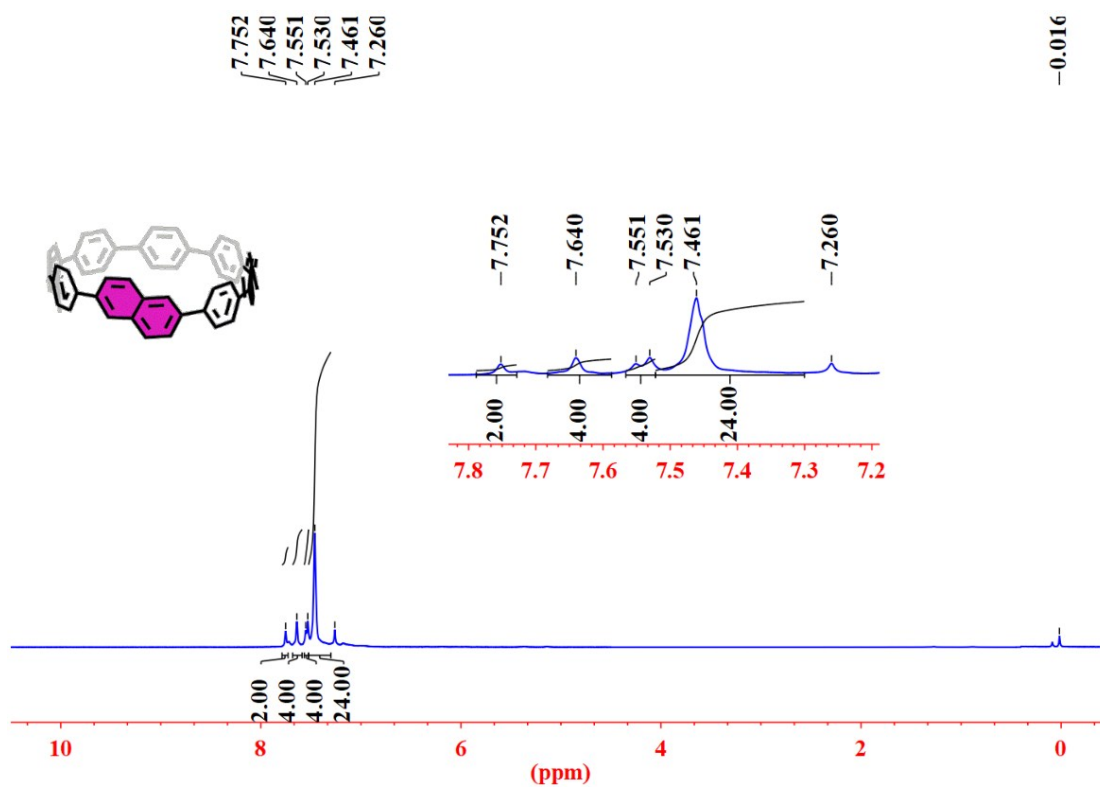

Figure S2. <sup>1</sup>H NMR spectrum of [7]CPPNa<sub>2,6</sub> in CDCl<sub>3</sub>.

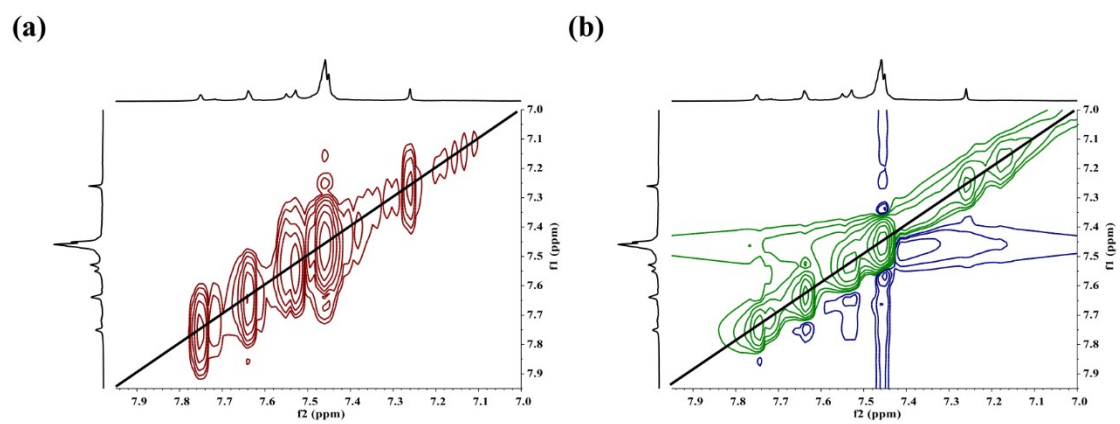

**Figure S3.** The expanded 2D  $^1\text{H}$ - $^1\text{H}$  COSY NMR (a) and 2D NOESY NMR (b) spectra (400 MHz) of  $[7]\text{CPPNa}_{2,6}$  in  $\text{CDCl}_3$ .

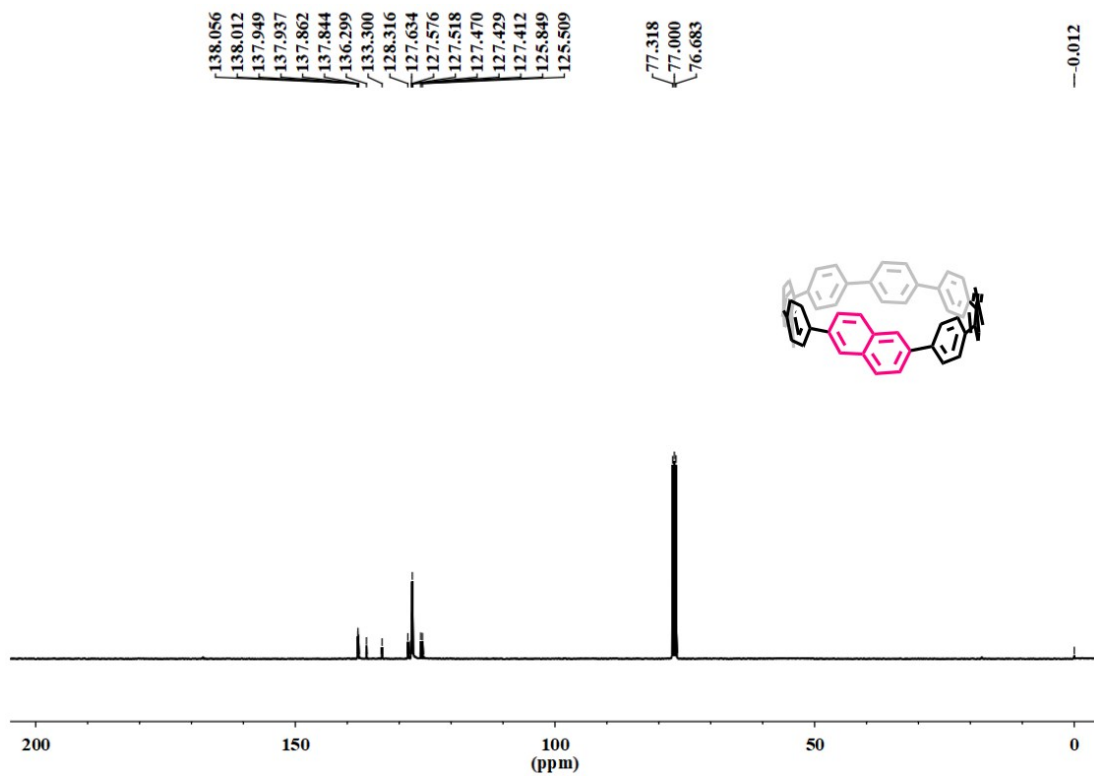

**Figure S4.** <sup>13</sup>C NMR spectrum of [7]CPPNa<sub>2,6</sub> in CDCl<sub>3</sub>.



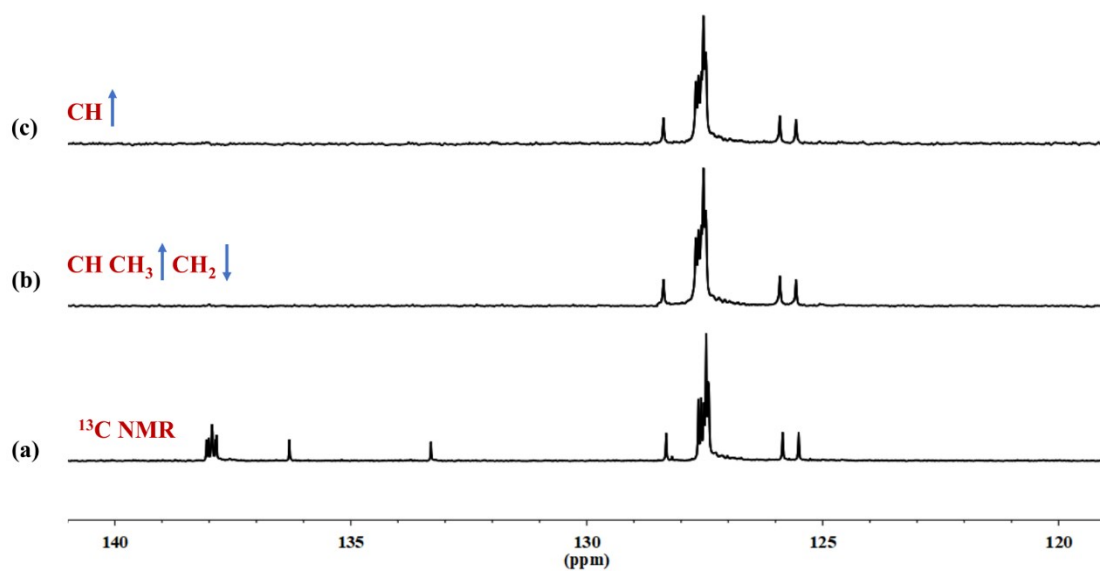

**Figure S5.** Aromatic region of <sup>13</sup>C NMR (a), DEPT-135° NMR (b), DEPT-90° NMR (c) spectrum of [7]CPPNa<sub>2,6</sub> in CDCl<sub>3</sub>.

### 3. Emission profiles of [7]CPPNa<sub>2,6</sub> in nitrogen atmosphere and air (Figure S6)

Photoluminescence of [7]CPPNa<sub>2,6</sub> was recorded after bubbling of nitrogen or air for 20 min (CH<sub>2</sub>Cl<sub>2</sub>, 1.0 × 10<sup>-5</sup> M).

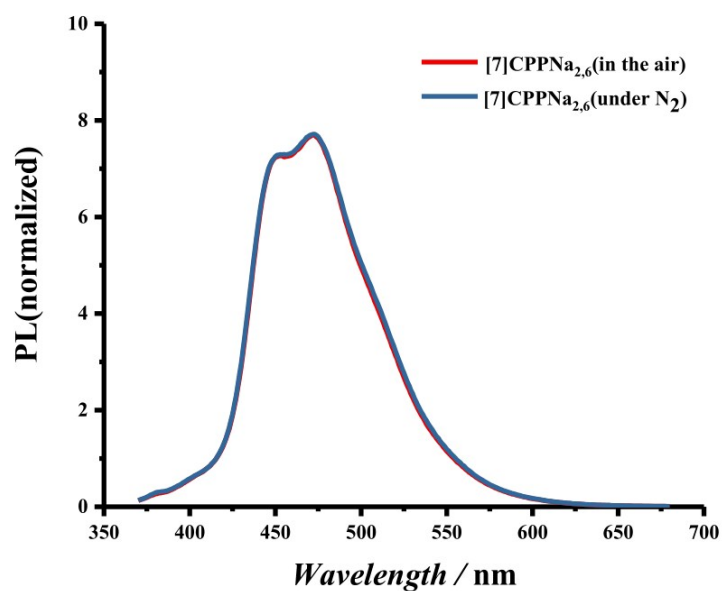

**Figure S6.** Normalized emission profiles of [7]CPPNa<sub>2,6</sub> in nitrogen atmosphere (blue) and in the air (red).

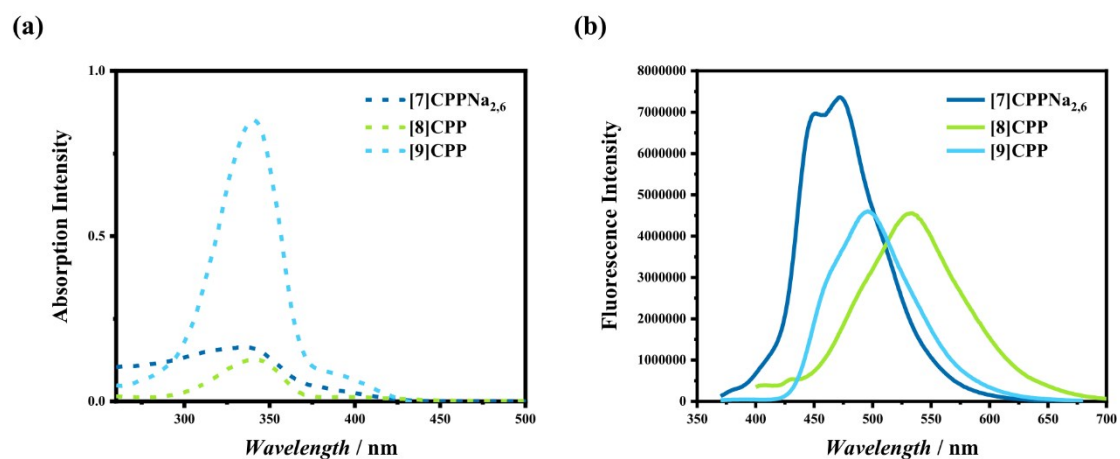

**Figure S7.** UV-Vis absorption (a) and fluorescence spectra (b) for [7]CPPNa<sub>2,6</sub> (blue), [8]CPP (yellow) and [9]CPP (cyan) in CH<sub>2</sub>Cl<sub>2</sub> ( $1.0 \times 10^{-5}$  M).

#### 4. Computational Details

All density functional theory calculations were performed by using Gaussian 09 software.<sup>[S3]</sup> Geometrical optimization were carried out by CAM-B3LYP/Def2-TZVP and further validated by frequency analysis. Solvent effect was corrected by polarizable continuum model. The tension energy was calculated using the reported computational methods.<sup>[S4]</sup> As shown in Figure S7, the strain energy was obtained according to the following formula: Strain energy =  $E([7]CPPNa_{2,6}) + 8 * E(\text{biphenyl}) - 7 * E(\text{Terphenyl}) - E(\text{naphthalene-diphenyl})$ . Based on the relaxed structure, time-dependence DFT with CAM-B3LYP/Def2-TZVP level was used to calculate the UV-Vis spectra. Concerning more accuracy of orbital energy by using B3LYP than CAM-B3LYP,<sup>[S5]</sup> B3LYP/Def2-TZVP computational level was used to identify the energy level of frontier orbitals. Moreover, as reference compounds for comparison, frontier molecular orbital energy of [8]CPP and [9]CPP molecules were calculated.

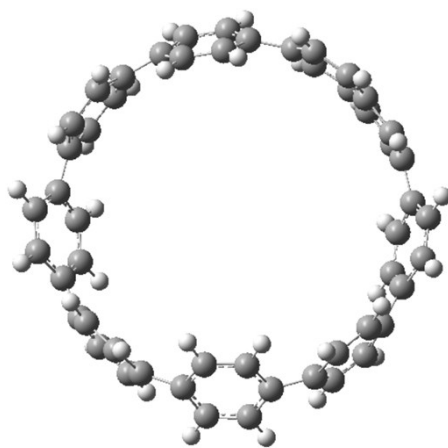

**Figure S8.** The relaxed structure of [7]CPPNa<sub>2,6</sub>.

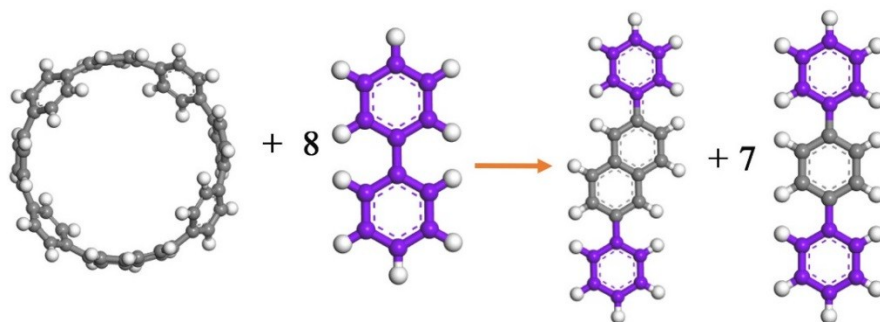

**Figure S9.** Strain-energy based homodesmotic reactions.

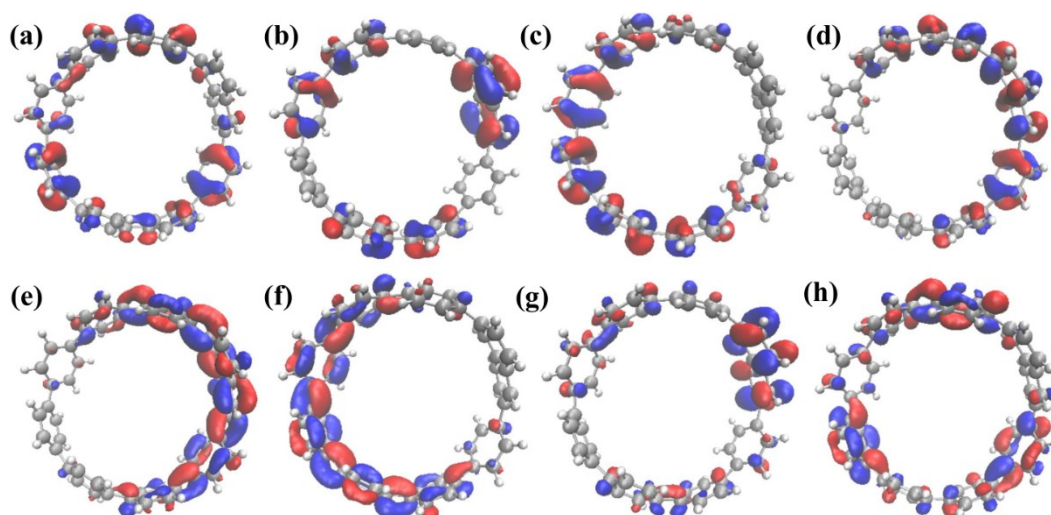

**Figure S10.** Frontier molecular orbitals of [7]CPPNa<sub>2,6</sub>: (a) HOMO-3, (b) HOMO-2, (c) HOMO-1, (d) HOMO, (e) LUMO, (f) LUMO+1, (g) LUMO+2 and (h) LUMO+3.

**Table S1. Energy of different moiety (unit: Hartree) and strain energy (unit: kcal/mol) of [7]CPPNa<sub>2,6</sub>, [8]CPP and [9]CPP.**

| <b>Name</b>                        | <b>[7]CPPNa<sub>2,6</sub></b> | <b>[8]CPP</b> | <b>[9]CPP</b> |
|------------------------------------|-------------------------------|---------------|---------------|
| <b>Total energy</b>                | -2001.53180120                | -1847.916135  | -2078.9401014 |
| <b>Biphenyl Energy</b>             | -463.19835880                 | -463.19835880 | -463.19835880 |
| <b>Triphenyl Energy</b>            | -694.20663170                 | -694.20663170 | -694.20663170 |
| <b>Naphthalene-diphenyl energy</b> | -847.81509160                 | -             | -             |
| <b>Strain energy (kal/mol)</b>     | 89.63                         | 94.16         | 84.31         |

**Table S2. Orbital energy level of [7]CPPNa<sub>2,6</sub>, [8]CPP and [9]CPP.**

| <b>Orbitals</b>        | <b>[7]CPPNa<sub>2,6</sub></b> | <b>[8]CPP</b> | <b>[9]CPP</b> |
|------------------------|-------------------------------|---------------|---------------|
| <b>LUMO+3</b>          | -1.1119                       | -0.9875       | -0.9045       |
| <b>LUMO+2</b>          | -1.3396                       | -1.5995       | -1.5894       |
| <b>LUMO+1</b>          | -2.0294                       | -1.5995       | -1.6621       |
| <b>LUMO</b>            | -2.0479                       | -2.2259       | -2.0871       |
| <b>HOMO</b>            | -5.5313                       | -5.3653       | -5.5125       |
| <b>HOMO-1</b>          | -5.5580                       | -5.9833       | -5.9234       |
| <b>HOMO-2</b>          | -6.3346                       | -5.9833       | -5.9827       |
| <b>HOMO-3</b>          | -6.4521                       | -6.9893       | -6.8127       |
| <b>Gap (HOMO-LUMO)</b> | 3.4834                        | 3.1394        | 3.4254        |

**Table S3. Main electronic transitions of [7]CPPNa<sub>2,6</sub> and Naphthalene obtained by TD-DFT with *f*<sub>os</sub> > 0.1**

| $\lambda_{\text{exp}}$ (nm)   | $\lambda_{\text{DFT}}$ (nm) | main transitions (coefficient)                                                                             | <i>f</i> <sub>os</sub> |
|-------------------------------|-----------------------------|------------------------------------------------------------------------------------------------------------|------------------------|
| <b>[7]CPPNa<sub>2,6</sub></b> |                             |                                                                                                            |                        |
| <b>335</b>                    | 325.22                      | HOMO→LUMO (40.1%)<br>HOMO-1→LUMO+1 (42%)                                                                   | 1.7289                 |
|                               | 325.54                      | HOMO→LUMO+1 (-41%)<br>HOMO-1→LUMO (41%)                                                                    | 1.9734                 |
|                               | 277.56                      | HOMO-2→LUMO (19%)<br>HOMO-1→LUMO+5 (39%)<br>HOMO→LUMO+6 (-22%)<br>HOMO-5→LUMO+1 (19%)<br>HOMO→LUMO+2 (17%) | 0.1044                 |
|                               | 275.24                      | HOMO-2→LUMO (31%)<br>HOMO-3→LUMO+1 (21%)<br>HOMO-1→LUMO+5 (-27%)<br>HOMO→LUMO+2 (25%)                      | 0.2428                 |

**Table S4. Coordinate of relaxed [7]CPPNa<sub>2,6</sub>.**

|   |           |           |           |   |           |           |           |
|---|-----------|-----------|-----------|---|-----------|-----------|-----------|
| C | -0.688527 | 0.154905  | -5.653249 | C | -0.365686 | -4.176945 | -3.478219 |
| C | 1.188009  | 2.196067  | -5.447518 | C | 0.031258  | -4.921509 | -2.387126 |
| C | 1.609091  | 0.921785  | -5.668649 | C | 1.872502  | -4.138368 | -4.269391 |
| C | -0.180123 | 2.484853  | -5.190382 | C | 0.180123  | -2.484853 | -5.190382 |
| C | -1.094892 | 1.486772  | -5.418788 | C | 0.560560  | -3.675203 | -4.390240 |
| C | 0.365686  | 4.176945  | -3.478219 | C | -1.188009 | -2.196067 | -5.447518 |
| C | -0.560560 | 3.675203  | -4.390240 | C | 0.688527  | -0.154905 | -5.653249 |
| C | -2.269583 | 4.888136  | -3.176327 | C | 1.094892  | -1.486772 | -5.418788 |
| C | -1.872502 | 4.138368  | -4.269391 | C | -1.609091 | -0.921785 | -5.668649 |
| C | -0.031258 | 4.921509  | -2.387126 | H | 1.918751  | 2.991591  | -5.397782 |
| C | -1.799699 | 5.525402  | -0.766567 | H | 2.665556  | 0.710421  | -5.777828 |
| C | -1.374233 | 5.208513  | -2.152556 | H | -2.148371 | 1.664322  | -5.246166 |
| C | -3.026476 | 5.064569  | -0.287769 | H | 1.400432  | 3.871745  | -3.534312 |
| C | -1.094892 | 5.760383  | 1.534587  | H | -3.313603 | 5.158025  | -3.087151 |
| C | -0.894583 | 5.991792  | 0.187382  | H | -2.618902 | 3.845589  | -4.996354 |
| C | -2.222278 | 5.077948  | 1.992790  | H | 0.712097  | 5.161748  | -1.641158 |
| C | -3.238249 | 4.858742  | 1.062019  | H | -3.791081 | 4.742476  | -0.981279 |
| C | -1.264149 | 4.637323  | 4.298217  | H | -0.297794 | 6.009567  | 2.221445  |
| C | -2.174331 | 4.342085  | 3.280877  | H | 0.037357  | 6.443977  | -0.122889 |
| C | -2.474452 | 2.172130  | 4.305272  | H | -4.173688 | 4.414250  | 1.373040  |
| C | -2.842322 | 3.122410  | 3.376446  | H | -0.771801 | 5.600539  | 4.322164  |
| C | -0.893047 | 3.682740  | 5.229316  | H | -2.932008 | 1.195443  | 4.241466  |
| C | -0.730132 | 1.208993  | 5.765905  | H | -3.570739 | 2.844538  | 2.628846  |
| C | -1.417721 | 2.389599  | 5.187732  | H | -0.123368 | 3.931975  | 5.948066  |
| C | -1.373967 | -0.021285 | 5.898269  | H | -2.454416 | -0.070564 | 5.898077  |
| C | 1.373967  | 0.021285  | 5.898269  | H | 2.454416  | 0.070564  | 5.898077  |
| C | 0.659907  | 1.204165  | 5.885965  | H | 1.207821  | 2.135674  | 5.843823  |
| C | 0.730132  | -1.208993 | 5.765905  | H | -1.207821 | -2.135674 | 5.843823  |
| C | -0.659907 | -1.204165 | 5.885965  | H | 2.932008  | -1.195443 | 4.241466  |
| C | 2.474452  | -2.172130 | 4.305272  | H | 0.771801  | -5.600539 | 4.322164  |
| C | 1.417721  | -2.389599 | 5.187732  | H | 0.123368  | -3.931975 | 5.948066  |
| C | 1.264149  | -4.637323 | 4.298217  | H | 3.570739  | -2.844538 | 2.628846  |
| C | 0.893047  | -3.682740 | 5.229316  | H | 0.297794  | -6.009567 | 2.221445  |
| C | 2.842322  | -3.122410 | 3.376446  | H | 3.791081  | -4.742476 | -0.981279 |
| C | 2.222278  | -5.077948 | 1.992790  | H | 4.173688  | -4.414250 | 1.373040  |
| C | 2.174331  | -4.342085 | 3.280877  | H | -0.037357 | -6.443977 | -0.122889 |
| C | 1.094892  | -5.760383 | 1.534587  | H | 3.313603  | -5.158025 | -3.087151 |
| C | 3.026476  | -5.064569 | -0.287769 | H | -1.400432 | -3.871745 | -3.534312 |
| C | 3.238249  | -4.858742 | 1.062019  | H | -0.712097 | -5.161748 | -1.641158 |
| C | 1.799699  | -5.525402 | -0.766567 | H | 2.618902  | -3.845589 | -4.996354 |
| C | 0.894583  | -5.991792 | 0.187382  | H | -1.918751 | -2.991591 | -5.397782 |



|   |          |           |           |   |           |           |           |
|---|----------|-----------|-----------|---|-----------|-----------|-----------|
| C | 2.269583 | -4.888136 | -3.176327 | H | 2.148371  | -1.664322 | -5.246166 |
| C | 1.374233 | -5.208513 | -2.152556 | H | -2.665556 | -0.710421 | -5.777828 |

**Table S5. Coordinate of relaxed [8]CPP.**

|          |                 |                  |                 |          |                  |                  |                 |
|----------|-----------------|------------------|-----------------|----------|------------------|------------------|-----------------|
| <b>C</b> | <b>4.486870</b> | <b>-3.250604</b> | <b>1.057847</b> | <b>C</b> | <b>-0.689429</b> | <b>-4.822529</b> | <b>1.530821</b> |
| C        | 4.225104        | -3.533567        | -1.282899       | C        | 0.692036         | -5.945411        | -0.559483       |
| C        | 5.282423        | -1.416290        | -0.434001       | C        | -0.692036        | -5.945411        | -0.559483       |
| C        | 4.764568        | -2.792754        | -0.230714       | C        | 1.416290         | -5.282423        | 0.434001        |
| C        | 5.945411        | -0.692036        | 0.559483        | C        | 0.689429         | -4.822529        | 1.530821        |
| C        | 4.822529        | 0.689429         | -1.530821       | C        | 3.250604         | -4.486870        | -1.057847       |
| C        | 4.822529        | -0.689429        | -1.530821       | C        | 2.792754         | -4.764568        | 0.230714        |
| C        | 5.282423        | 1.416290         | -0.434001       | C        | 3.533567         | -4.225104        | 1.282899        |
| C        | 5.945411        | 0.692036         | 0.559483        | H        | 4.923486         | -2.754542        | 1.913761        |
| C        | 4.225104        | 3.533567         | -1.282899       | H        | 4.476159         | -3.287947        | -2.305604       |
| C        | 4.764568        | 2.792754         | -0.230714       | H        | 6.396794         | -1.208102        | 1.396546        |
| C        | 3.533567        | 4.225104         | 1.282899        | H        | 4.320997         | 1.194448         | -2.343351       |
| C        | 4.486870        | 3.250604         | 1.057847        | H        | 4.320997         | -1.194448        | -2.343351       |
| C        | 3.250604        | 4.486870         | -1.057847       | H        | 6.396794         | 1.208102         | 1.396546        |
| C        | 1.416290        | 5.282423         | 0.434001        | H        | 4.476159         | 3.287947         | -2.305604       |
| C        | 2.792754        | 4.764568         | 0.230714        | H        | 3.287947         | 4.476159         | 2.305604        |
| C        | 0.689429        | 4.822529         | 1.530821        | H        | 4.923486         | 2.754542         | 1.913761        |
| C        | -0.692036       | 5.945411         | -0.559483       | H        | 2.754542         | 4.923486         | -1.913761       |
| C        | 0.692036        | 5.945411         | -0.559483       | H        | 1.194448         | 4.320997         | 2.343351        |
| C        | -1.416290       | 5.282423         | 0.434001        | H        | -1.208102        | 6.396794         | -1.396546       |
| C        | -0.689429       | 4.822529         | 1.530821        | H        | 1.208102         | 6.396794         | -1.396546       |
| C        | -3.250604       | 4.486870         | -1.057847       | H        | -1.194448        | 4.320997         | 2.343351        |
| C        | -2.792754       | 4.764568         | 0.230714        | H        | -2.754542        | 4.923486         | -1.913761       |
| C        | -4.486870       | 3.250604         | 1.057847        | H        | -4.923486        | 2.754542         | 1.913761        |
| C        | -3.533567       | 4.225104         | 1.282899        | H        | -3.287947        | 4.476159         | 2.305604        |
| C        | -4.225104       | 3.533567         | -1.282899       | H        | -4.476159        | 3.287947         | -2.305604       |
| C        | -5.282423       | 1.416290         | -0.434001       | H        | -6.396794        | 1.208102         | 1.396546        |
| C        | -4.764568       | 2.792754         | -0.230714       | H        | -4.320997        | -1.194448        | -2.343351       |
| C        | -5.945411       | 0.692036         | 0.559483        | H        | -4.320997        | 1.194448         | -2.343351       |
| C        | -4.822529       | -0.689429        | -1.530821       | H        | -6.396794        | -1.208102        | 1.396546        |
| C        | -4.822529       | 0.689429         | -1.530821       | H        | -4.476159        | -3.287947        | -2.305604       |
| C        | -5.282423       | -1.416290        | -0.434001       | H        | -3.287947        | -4.476159        | 2.305604        |
| C        | -5.945411       | -0.692036        | 0.559483        | H        | -4.923486        | -2.754542        | 1.913761        |
| C        | -4.225104       | -3.533567        | -1.282899       | H        | -2.754542        | -4.923486        | -1.913761       |
| C        | -4.764568       | -2.792754        | -0.230714       | H        | -1.194448        | -4.320997        | 2.343351        |
| C        | -3.533567       | -4.225104        | 1.282899        | H        | 1.208102         | -6.396794        | -1.396546       |
| C        | -4.486870       | -3.250604        | 1.057847        | H        | -1.208102        | -6.396794        | -1.396546       |
| C        | -3.250604       | -4.486870        | -1.057847       | H        | 1.194448         | -4.320997        | 2.343351        |

|   |           |           |          |   |          |           |           |
|---|-----------|-----------|----------|---|----------|-----------|-----------|
| C | -1.416290 | -5.282423 | 0.434001 | H | 2.754542 | -4.923486 | -1.913761 |
| C | -2.792754 | -4.764568 | 0.230714 | H | 3.287947 | -4.476159 | 2.305604  |

**Table S6. Coordinate of relaxed [9]CPP.**

|          |                  |                  |                 |          |                 |                  |                 |
|----------|------------------|------------------|-----------------|----------|-----------------|------------------|-----------------|
| <b>C</b> | <b>-1.337633</b> | <b>-3.164910</b> | <b>4.768500</b> | <b>C</b> | <b>1.236024</b> | <b>-5.827197</b> | <b>0.356686</b> |
| C        | 0.874912         | -3.668958        | 5.469580        | C        | 0.094351        | -6.217581        | -0.340035       |
| C        | -0.115695        | -1.411703        | 6.036360        | C        | -1.068957       | -6.313500        | 1.778106        |
| C        | -0.214854        | -2.796083        | 5.508345        | C        | -1.027541       | -6.556606        | 0.417935        |
| C        | -1.237910        | -0.592567        | 6.161647        | C        | 1.196104        | -5.587725        | 1.717124        |
| C        | 1.237910         | 0.592567         | 6.161647        | C        | -0.141795       | -4.974860        | 3.705236        |
| C        | 1.125380         | -0.784133        | 6.147049        | C        | 0.011651        | -5.725718        | 2.436812        |
| C        | 0.115695         | 1.411703         | 6.036360        | C        | -1.303837       | -4.230258        | 3.892042        |
| C        | -1.125380        | 0.784133         | 6.147049        | C        | 0.914078        | -4.730357        | 4.583039        |
| C        | 1.337633         | 3.164910         | 4.768500        | H        | -2.219241       | -2.540958        | 4.771858        |
| C        | 0.214854         | 2.796083         | 5.508345        | H        | 1.745026        | -3.478698        | 6.083247        |
| C        | -0.914078        | 4.730357         | 4.583039        | H        | -2.229224       | -1.023638        | 6.169685        |
| C        | -0.874912        | 3.668958         | 5.469580        | H        | 2.229224        | 1.023638         | 6.169685        |
| C        | 1.303837         | 4.230258         | 3.892042        | H        | 2.033826        | -1.368820        | 6.110533        |
| C        | -0.011651        | 5.725718         | 2.436812        | H        | -2.033826       | 1.368820         | 6.110533        |
| C        | 0.141795         | 4.974860         | 3.705236        | H        | 2.219241        | 2.540958         | 4.771858        |
| C        | -1.196104        | 5.587725         | 1.717124        | H        | -1.812907       | 5.330789         | 4.525489        |
| C        | 1.027541         | 6.556606         | 0.417935        | H        | -1.745026       | 3.478698         | 6.083247        |
| C        | 1.068957         | 6.313500         | 1.778106        | H        | 2.155486        | 4.395512         | 3.246405        |
| C        | -0.094351        | 6.217581         | -0.340035       | H        | -2.064891       | 5.153616         | 2.193254        |
| C        | -1.236024        | 5.827197         | 0.356686        | H        | 1.912887        | 6.940757         | -0.071758       |
| C        | 1.150092         | 5.407166         | -2.317868       | H        | 1.985887        | 6.510651         | 2.318431        |
| C        | -0.020439        | 5.955267         | -1.797642       | H        | -2.135583       | 5.571641         | -0.186398       |
| C        | -1.150099        | 5.250499         | -3.817246       | H        | 2.052183        | 5.403195         | -1.721749       |
| C        | -1.145646        | 5.947964         | -2.623087       | H        | -2.066179       | 5.203968         | -4.391680       |
| C        | 1.145646         | 4.710722         | -3.510435       | H        | -2.058257       | 6.428552         | -2.295259       |
| C        | -0.115874        | 3.392474         | -5.181797       | H        | 2.044423        | 4.186950         | -3.805505       |
| C        | -0.029893        | 4.531196         | -4.236093       | H        | -2.155307       | 2.954064         | -4.677425       |
| C        | -1.263421        | 2.602572         | -5.177718       | H        | 1.930380        | 1.216018         | -6.781084       |
| C        | 1.021318         | 1.592507         | -6.330204       | H        | 1.886555        | 3.500602         | -5.958287       |
| C        | 0.996291         | 2.892965         | -5.861131       | H        | -2.112904       | 0.683994         | -5.500711       |
| C        | -0.065767        | 0.738279         | -6.141793       | H        | 2.112904        | -0.683994        | -5.500711       |
| C        | -1.239226        | 1.304044         | -5.648253       | H        | -1.886555       | -3.500602        | -5.958287       |
| C        | 1.239226         | -1.304044        | -5.648253       | H        | -1.930380       | -1.216018        | -6.781084       |
| C        | 0.065767         | -0.738279        | -6.141793       | H        | 2.155307        | -2.954064        | -4.677425       |
| C        | -0.996291        | -2.892965        | -5.861131       | H        | -2.044423       | -4.186950        | -3.805505       |
| C        | -1.021318        | -1.592507        | -6.330204       | H        | 2.058257        | -6.428552        | -2.295259       |
| C        | 1.263421         | -2.602572        | -5.177718       | H        | 2.066179        | -5.203968        | -4.391680       |

|   |           |           |           |   |           |           |           |
|---|-----------|-----------|-----------|---|-----------|-----------|-----------|
| C | 0.029893  | -4.531196 | -4.236093 | H | -2.052183 | -5.403195 | -1.721749 |
| C | 0.115874  | -3.392474 | -5.181797 | H | 2.135583  | -5.571641 | -0.186398 |
| C | -1.145646 | -4.710722 | -3.510435 | H | -1.985887 | -6.510651 | 2.318431  |
| C | 1.145646  | -5.947964 | -2.623087 | H | -1.912887 | -6.940757 | -0.071758 |
| C | 1.150099  | -5.250499 | -3.817246 | H | 2.064891  | -5.153616 | 2.193254  |
| C | 0.020439  | -5.955267 | -1.797642 | H | -2.155486 | -4.395512 | 3.246405  |
| C | -1.150092 | -5.407166 | -2.317868 | H | 1.812907  | -5.330789 | 4.525489  |

## References

- [S1] Q. Huang, G. L. Zhuang, H. X. Jia, M. M. Qian, S. S. Cui, S. F. Yang and P. Du, *Angew. Chem. Int. Ed.*, 2019, 131, 6310-6315.
- [S2] Meng, W., League, A. B., Ronson, T. K., Clegg, J. K., Isley, W. C., Semrouni, D., Gagliardi, L., Cramer, C. J., Nitschke, J. R. *J. Am. Chem. Soc.* 2014, 136, 3972-3980.
- [S3] Gaussian 09, Revision A.01, M. J. Frisch, et al Gaussian, Inc., Wallingford CT, 2009.
- [S4] Y. Segawa, H. Omachi, K. Itami, *Org. Lett.*, 2010, 12, 2262.
- [S5] T. M. McCormick, C. R. Bridges, E. I. Carrera, P. M. DiCarmine, G. L. Gibson, J. Hollinger, L. M. Kozycz, D. S. Seferos, *Macromolecules*, 2013, 46, 3879.
